# Supplementary material for: Inhibitors of ABCB1 and ABCG2 overcame resistance to topoisomerase inhibitors in small cell lung cancer
Source: PubMed Central journal article supplement (PMC9346178; doi:10.1111/1759-7714.14527), 2022-06-20
Supplement: TCA-13-2142-s001.pdf [file TCA-13-2142-s001.pdf]

**Figure S4.**

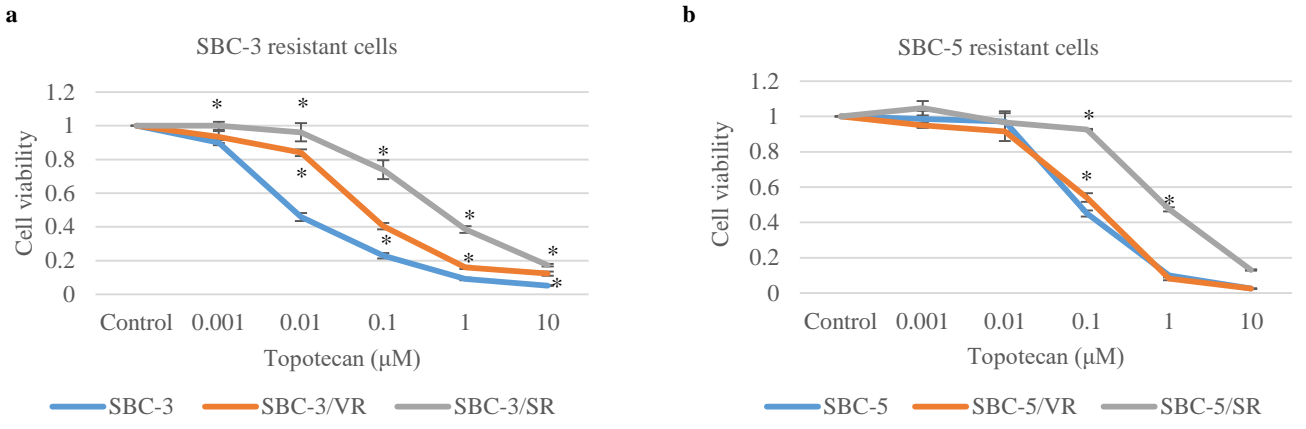

**Figure S4.**

Tetrazolium (MTS) assays using SBC-3 resistant cells (a) and SBC-5 resistant cells (b) with topotecan. SN-38-resistant cells were resistant to topotecan. \* $p < 0.05$  compared to parental cells.
