# Supplementary material for: Inhibitors of ABCB1 and ABCG2 overcame resistance to topoisomerase inhibitors in small cell lung cancer
Source: PubMed Central journal article supplement (PMC9346178; doi:10.1111/1759-7714.14527), 2022-06-20
Supplement: TCA-13-2142-s002.pdf [file TCA-13-2142-s002.pdf]

**Figure S2.**

**a**

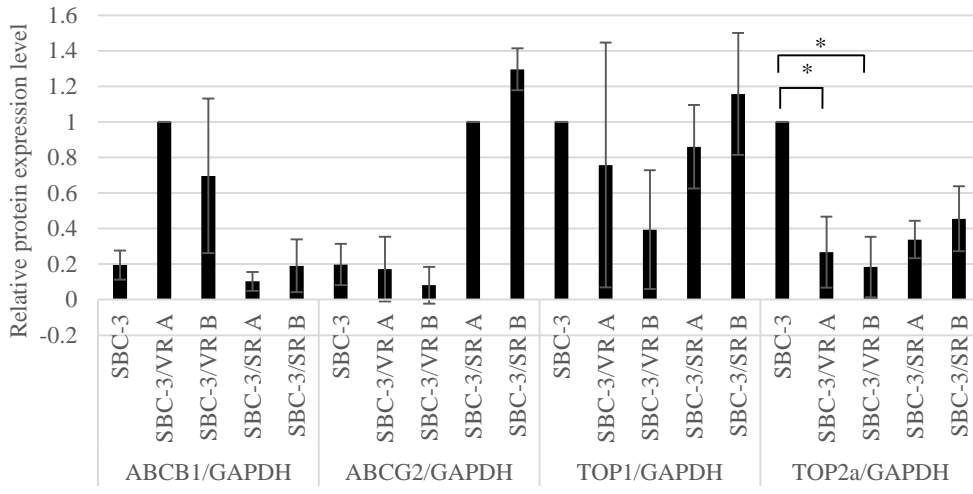

**b**

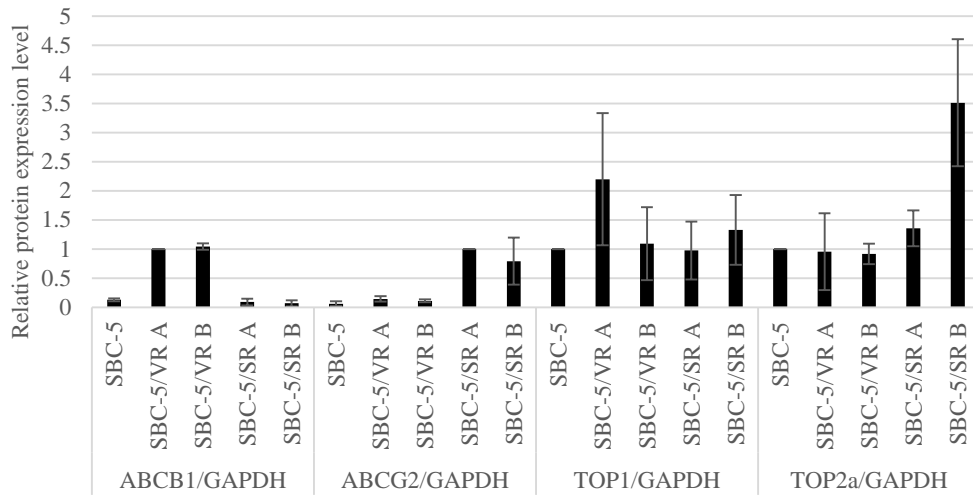

**Figure S2.**

Quantification of protein expression of resistant cells of SBC-3 (a) and SBC-5 (b). ABCB1, ATP-binding cassette sub-family B member 1; ABCG2, ATP-binding cassette sub-family G member 2; GAPDH, glyceraldehyde 3-phosphate dehydrogenase. \* $p < 0.05$
