# Supplementary material for: Inhibitors of ABCB1 and ABCG2 overcame resistance to topoisomerase inhibitors in small cell lung cancer
Source: PubMed Central journal article supplement (PMC9346178; doi:10.1111/1759-7714.14527), 2022-06-20
Supplement: TCA-13-2142-s003.pdf [file TCA-13-2142-s003.pdf]

**Figure S9.**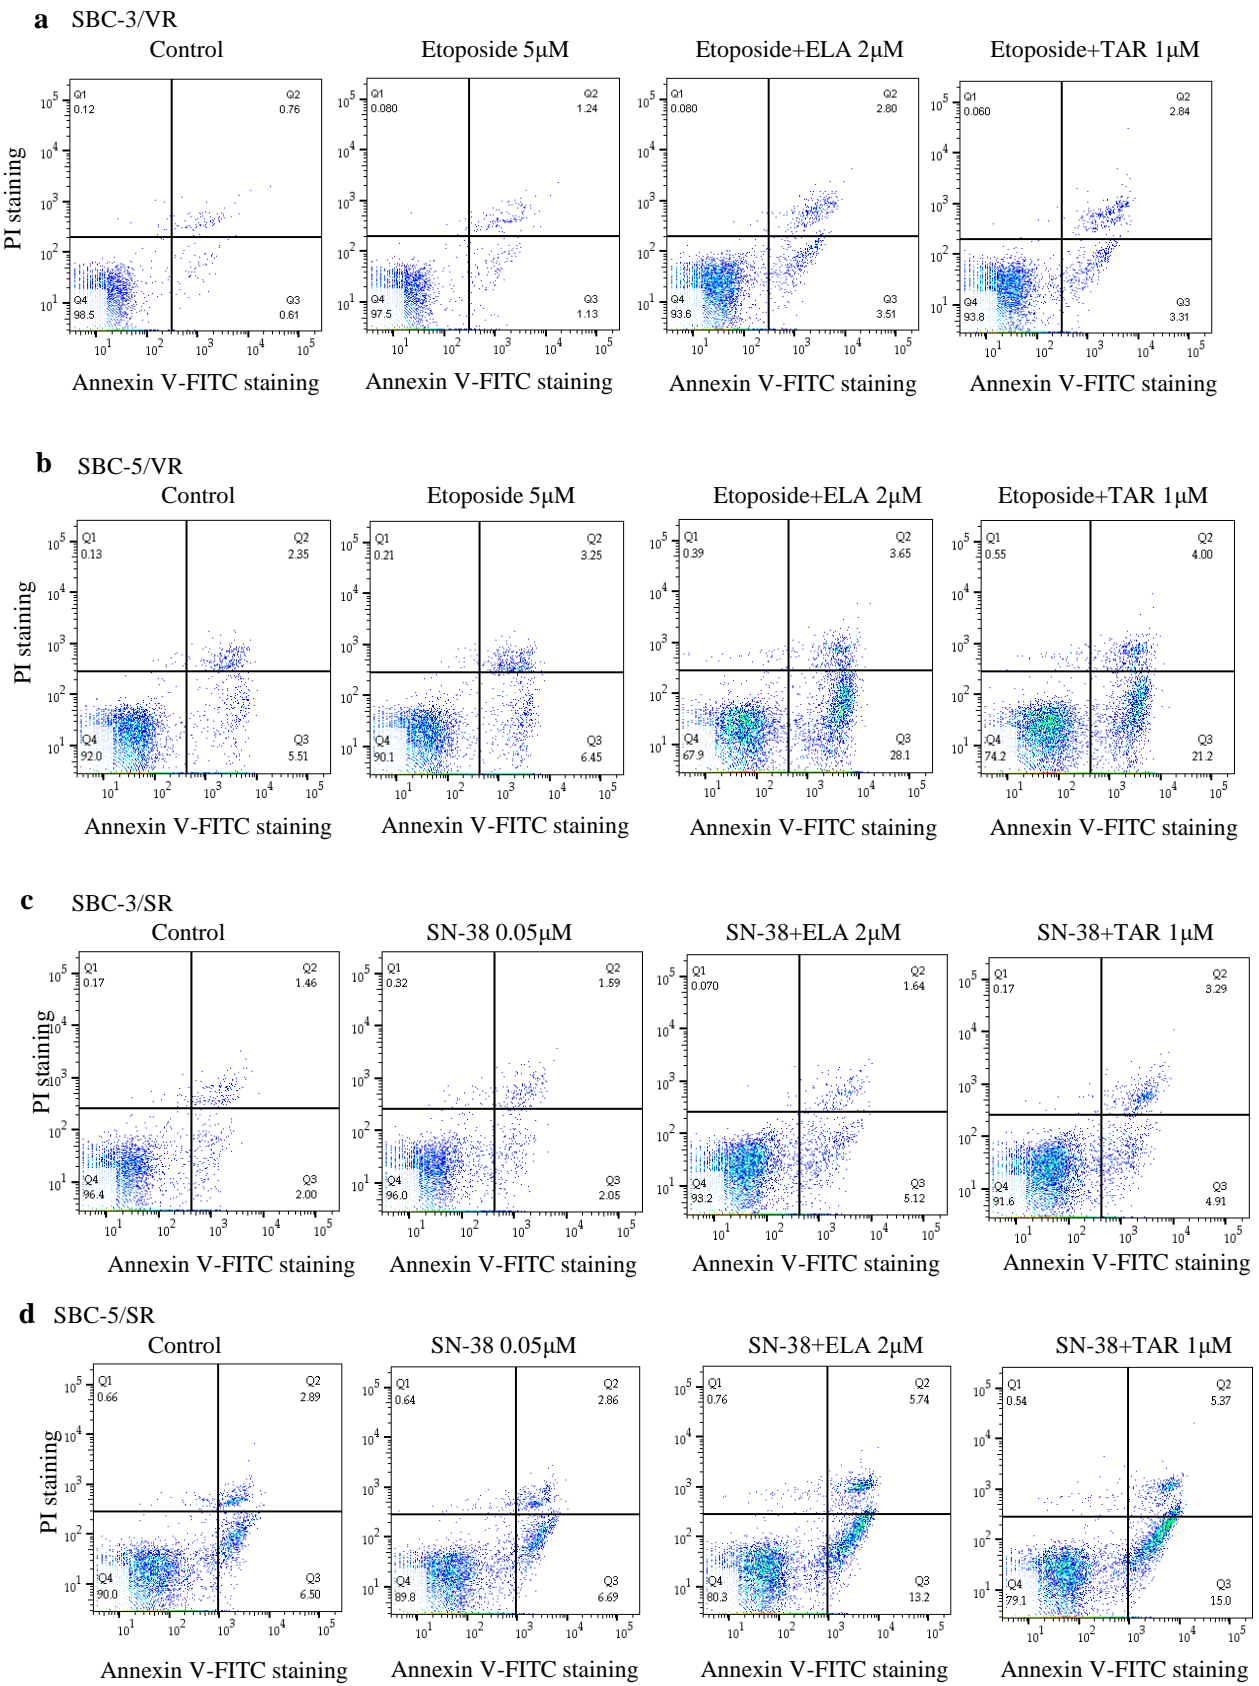**Figure S9.**

The promotion of apoptosis was evaluated by flow cytometry: etoposide-resistant cells (a, b), SN-38-resistant cells (c, d). ABC transporter inhibitors promoted apoptosis in resistant cells. ELA, elacridar; FITC, fluorescein isothiocyanate; PI, propidium iodide; TAR, tariquidar.
