# Supplementary material for: Inhibitors of ABCB1 and ABCG2 overcame resistance to topoisomerase inhibitors in small cell lung cancer
Source: PubMed Central journal article supplement (PMC9346178; doi:10.1111/1759-7714.14527), 2022-06-20
Supplement: TCA-13-2142-s004.pdf [file TCA-13-2142-s004.pdf]

**Figure S8.**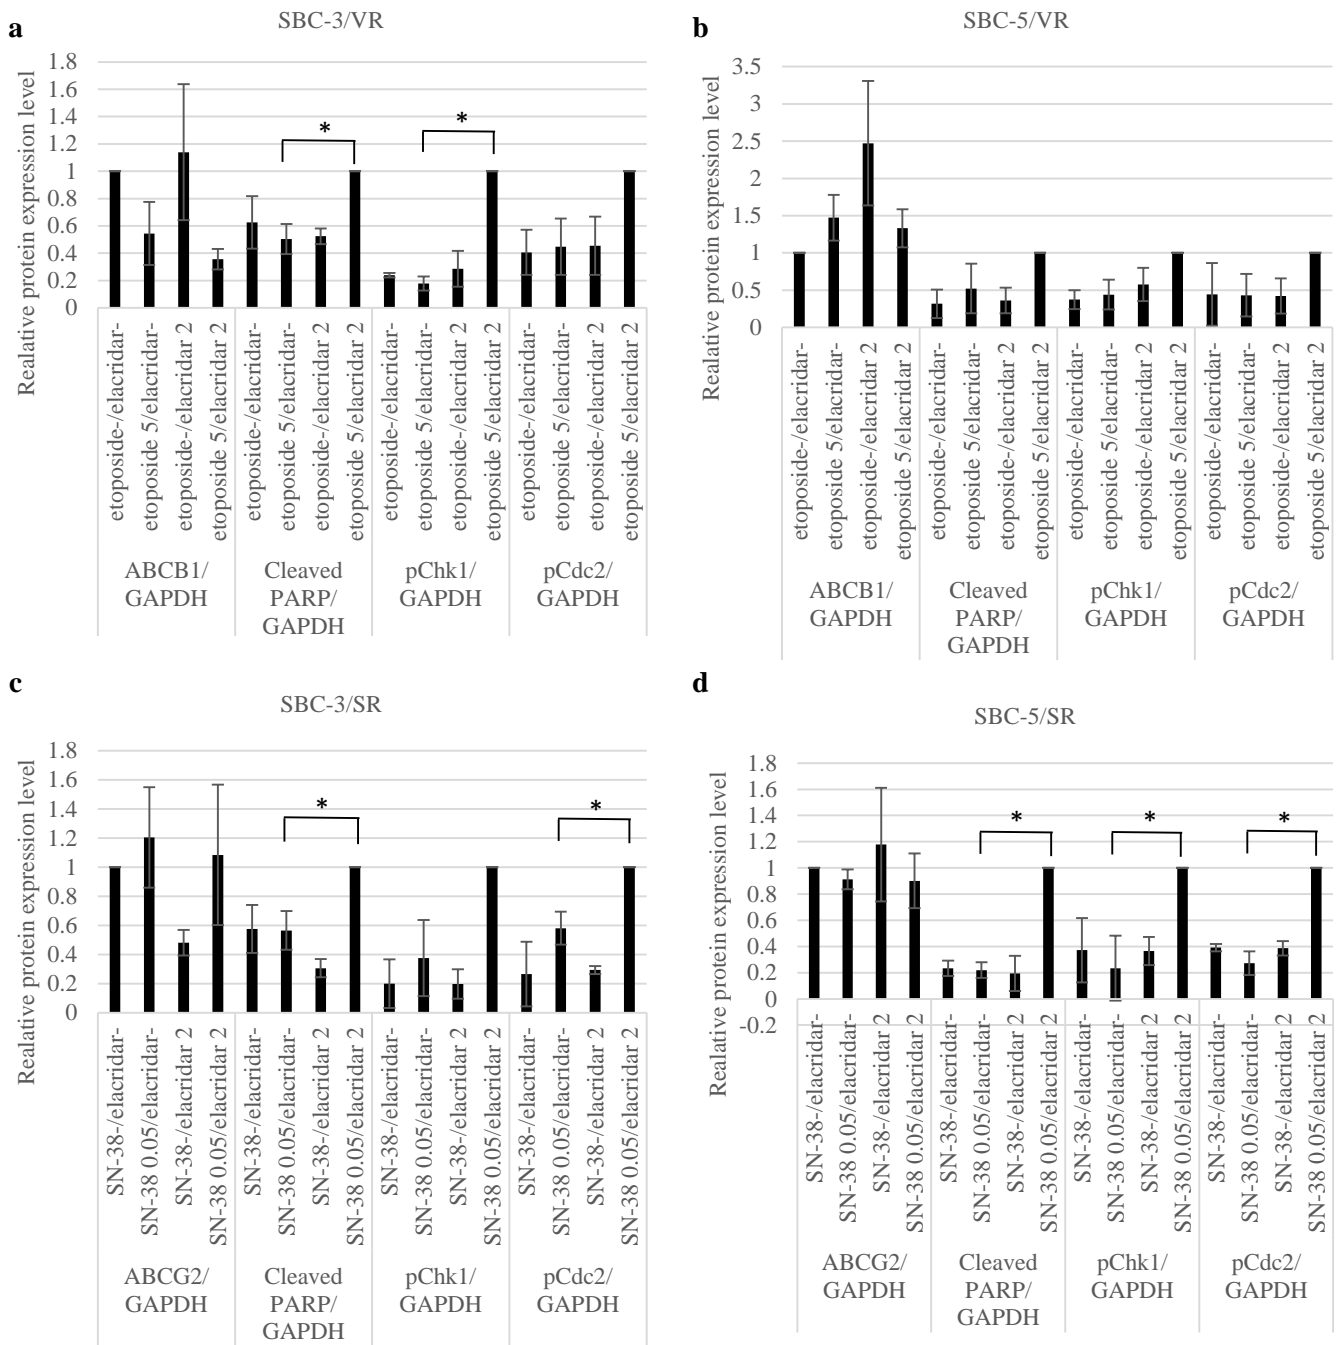**Figure S8.**

Quantification of protein expression in resistant cells treated with topoisomerase inhibitors and elacridar: etoposide-resistant cells with etoposide (a, b), SN-38-resistant cells with SN-38 (c, d). ABCB1, ATP-binding cassette sub-family B member 1; ABCG2, ATP-binding cassette sub-family G member 2; p-Chk1, phosphorylated-Chk1; p-Cdc2, phosphorylated-Cdc2; GAPDH, glyceraldehyde 3-phosphate dehydrogenase; PARP, poly ADP ribose polymerase. \* $p < 0.05$
