# Supplementary material for: Inhibitors of ABCB1 and ABCG2 overcame resistance to topoisomerase inhibitors in small cell lung cancer
Source: PubMed Central journal article supplement (PMC9346178; doi:10.1111/1759-7714.14527), 2022-06-20
Supplement: TCA-13-2142-s005.pdf [file TCA-13-2142-s005.pdf]

**Figure S6.**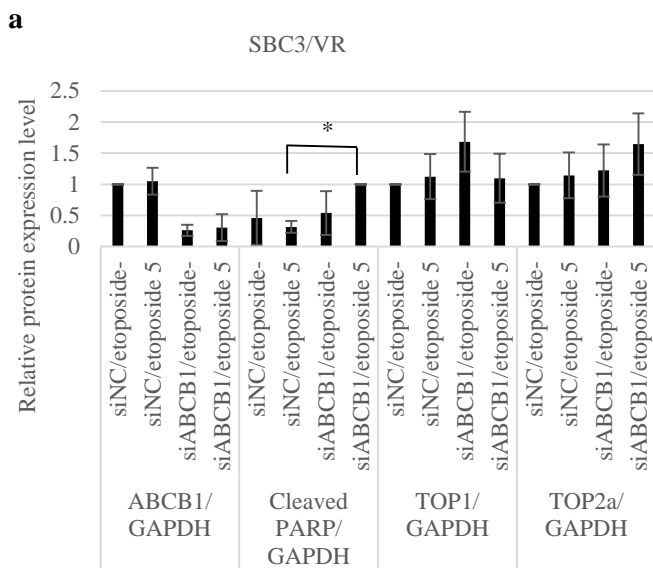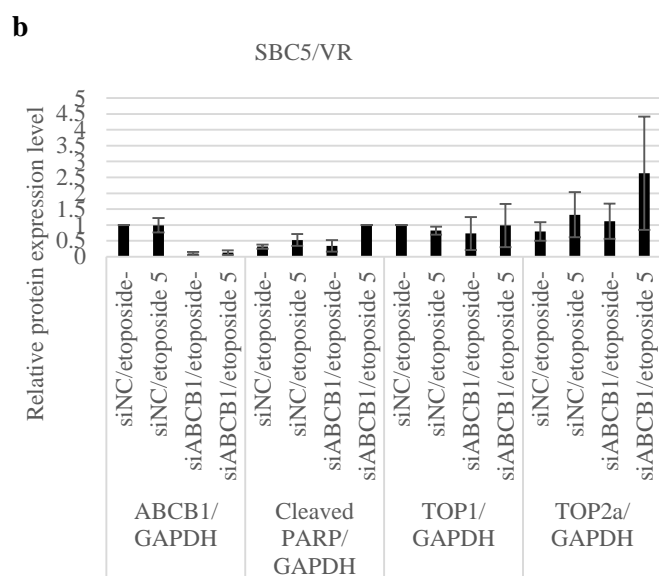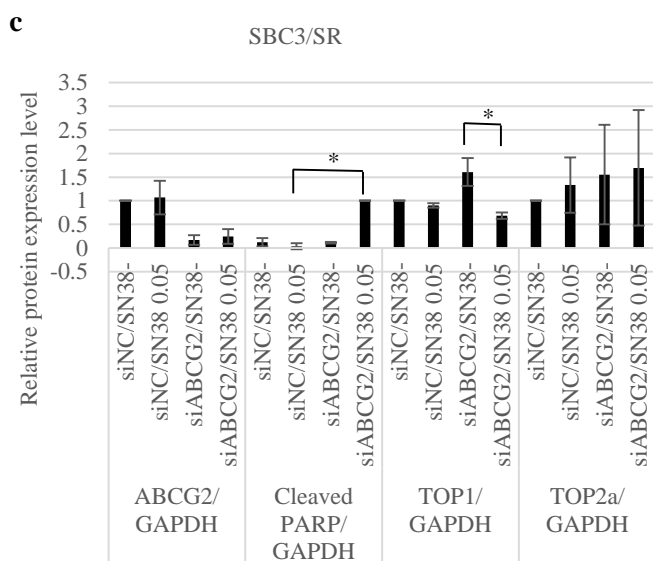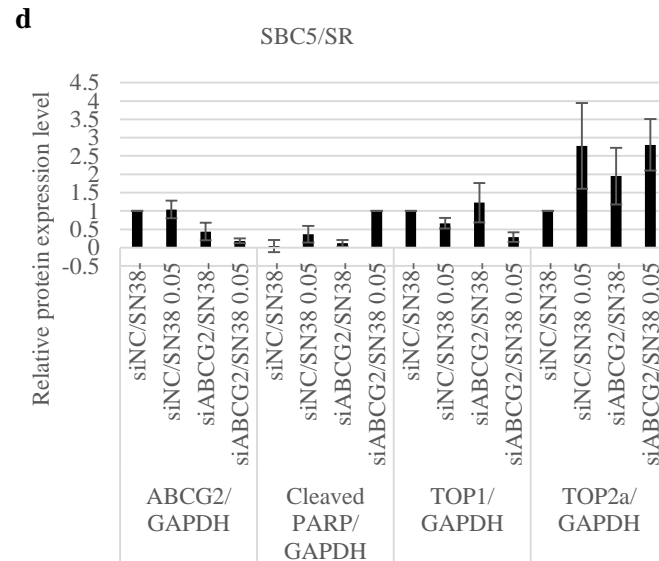**Figure S6.**

Quantification of protein expression in resistant cells by the inhibition of ABC transporters using siRNAs combined with topoisomerase inhibitors: etoposide-resistant cells (a, b), SN-38-resistant cells (c, d). ABCB1, ATP-binding cassette sub-family B member 1; ABCG2, ATP-binding cassette sub-family G member 2; GAPDH, glyceraldehyde 3-phosphate dehydrogenase; NC, negative control; PARP, poly ADP ribose polymerase; TOP, topoisomerase. \* $p < 0.05$
