# Supplementary material for: Inhibitors of ABCB1 and ABCG2 overcame resistance to topoisomerase inhibitors in small cell lung cancer
Source: PubMed Central journal article supplement (PMC9346178; doi:10.1111/1759-7714.14527), 2022-06-20
Supplement: TCA-13-2142-s006.pdf [file TCA-13-2142-s006.pdf]

Figure S5.

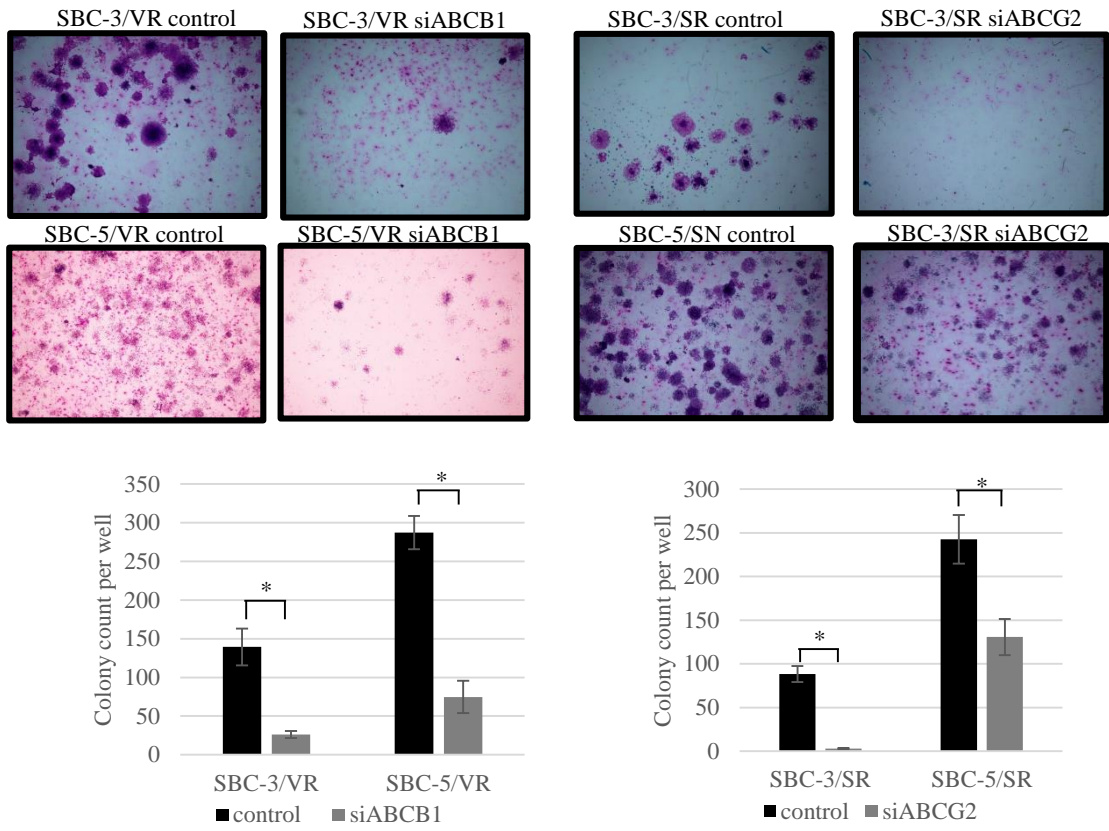

Figure S5.

Colony formation assay after inhibition of ATP-binding cassette sub-family B member 1 (ABCB1) or ATP-binding cassette sub-family G member 2 (ABCG2). The clonogenic ability response to topoisomerase inhibitors of resistant cells following transfection with siRNAs was greater than that with siRNA controls.  $*p < 0.05$
