# Supplementary material for: Inhibitors of ABCB1 and ABCG2 overcame resistance to topoisomerase inhibitors in small cell lung cancer
Source: PubMed Central journal article supplement (PMC9346178; doi:10.1111/1759-7714.14527), 2022-06-20
Supplement: TCA-13-2142-s007.pdf [file TCA-13-2142-s007.pdf]

**Figure S7.**

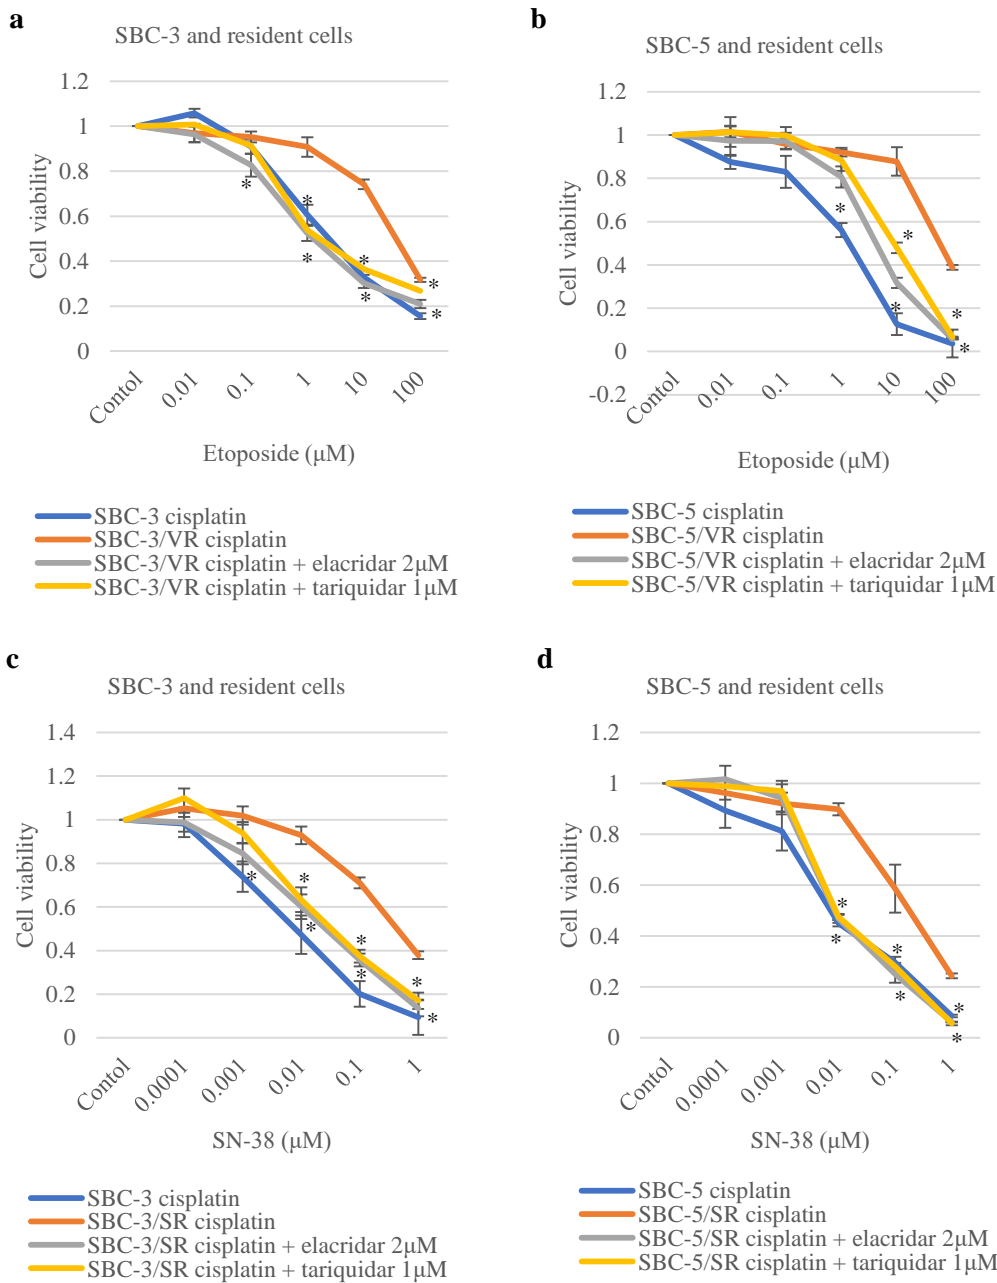

**Figure S7.**

Tetrazolium (MTS) assays using sensitive and resistant cells treated with etoposide (a, b) or SN-38 (c, d) plus 0.2 $\mu\text{M}$  cisplatin. \* $p < 0.05$  compared to resistant cells with cisplatin only.
