# Supplementary material for: Inhibitors of ABCB1 and ABCG2 overcame resistance to topoisomerase inhibitors in small cell lung cancer
Source: PubMed Central journal article supplement (PMC9346178; doi:10.1111/1759-7714.14527), 2022-06-20
Supplement: TCA-13-2142-s008.pdf [file TCA-13-2142-s008.pdf]

**Figure S3.**

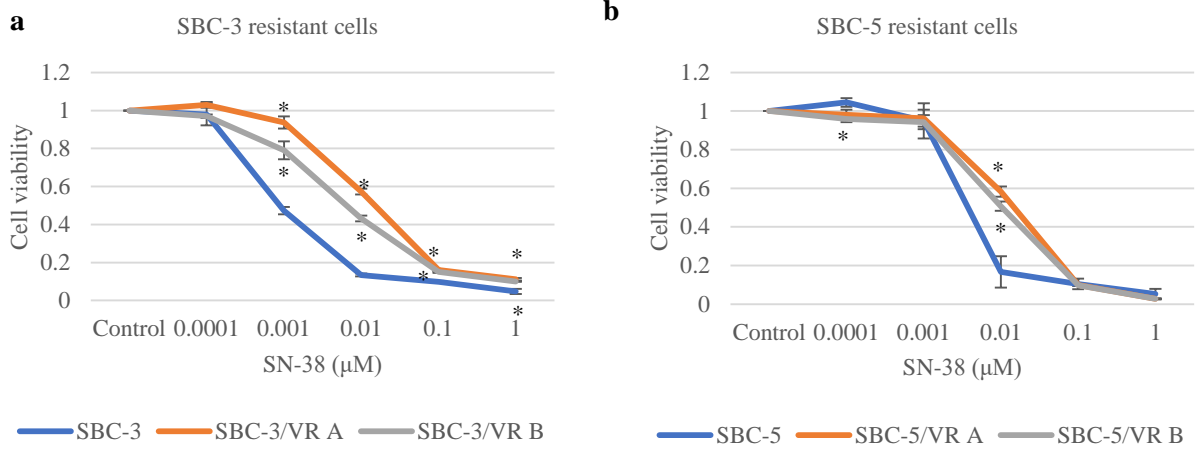

**Figure S3.**

Tetrazolium (MTS) assays using SBC-3/VR A, B (a) and SBC-5/VR A, B (b) with SN-38. Etoposide-resistant cells tended to be resistant to SN-38. \* $p < 0.05$  compared to parental cells.
