# Supplementary material for: Inhibitors of ABCB1 and ABCG2 overcame resistance to topoisomerase inhibitors in small cell lung cancer
Source: PubMed Central journal article supplement (PMC9346178; doi:10.1111/1759-7714.14527), 2022-06-20
Supplement: TCA-13-2142-s009.pdf [file TCA-13-2142-s009.pdf]

**Figure S10.**

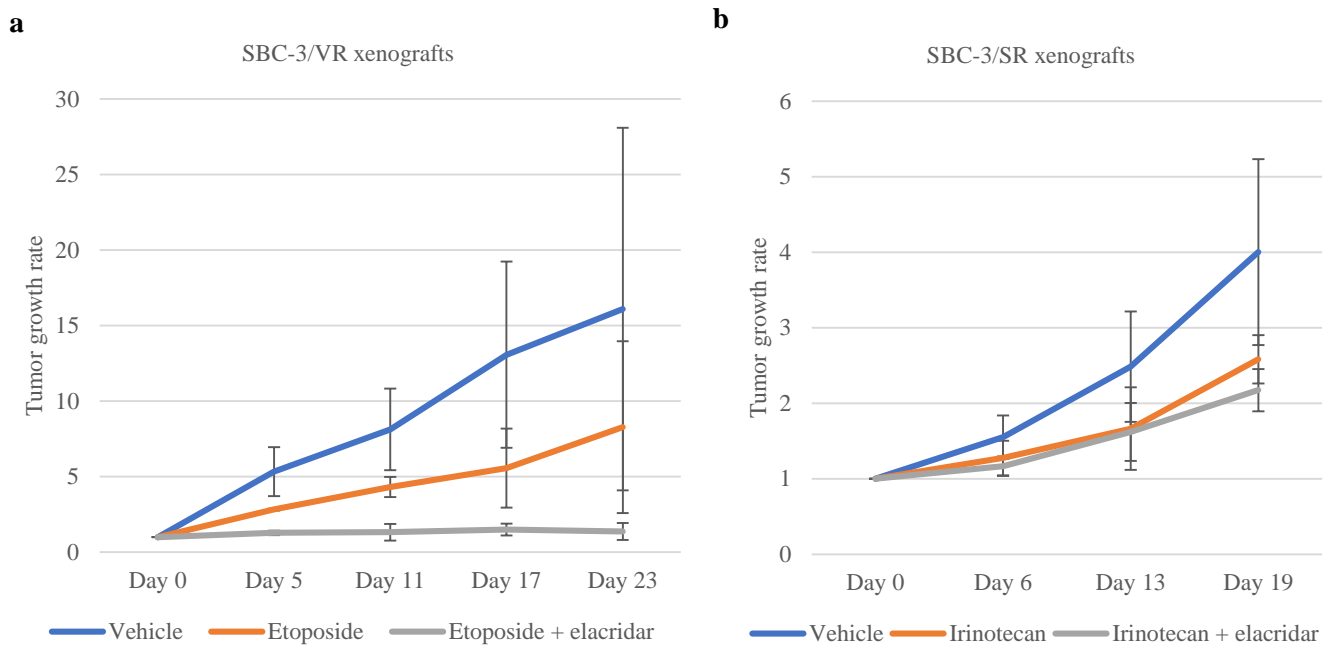

**Figure S10.**

Combination therapy with elacridar and topoisomerase inhibitors suppresses the growth of chemoresistant tumors *in vivo*: SBC-3/VR xenografts (a), SBC-3/SR xenografts (b).
